# Supplementary material for: Characterization and localization of cyclin B3 transcript in both oocyte and spermatocyte of the rainbow trout (Oncorhynchus mykiss)
Source: PeerJ journal article supplement (doi:10.7717/peerj.7396), 2019-07-24

A

B

Ey Gi Sp Br He Ki St Sk Mu Ov Te N

Ey Gi Sp Br He Ki St Sk Mu Ov Te N

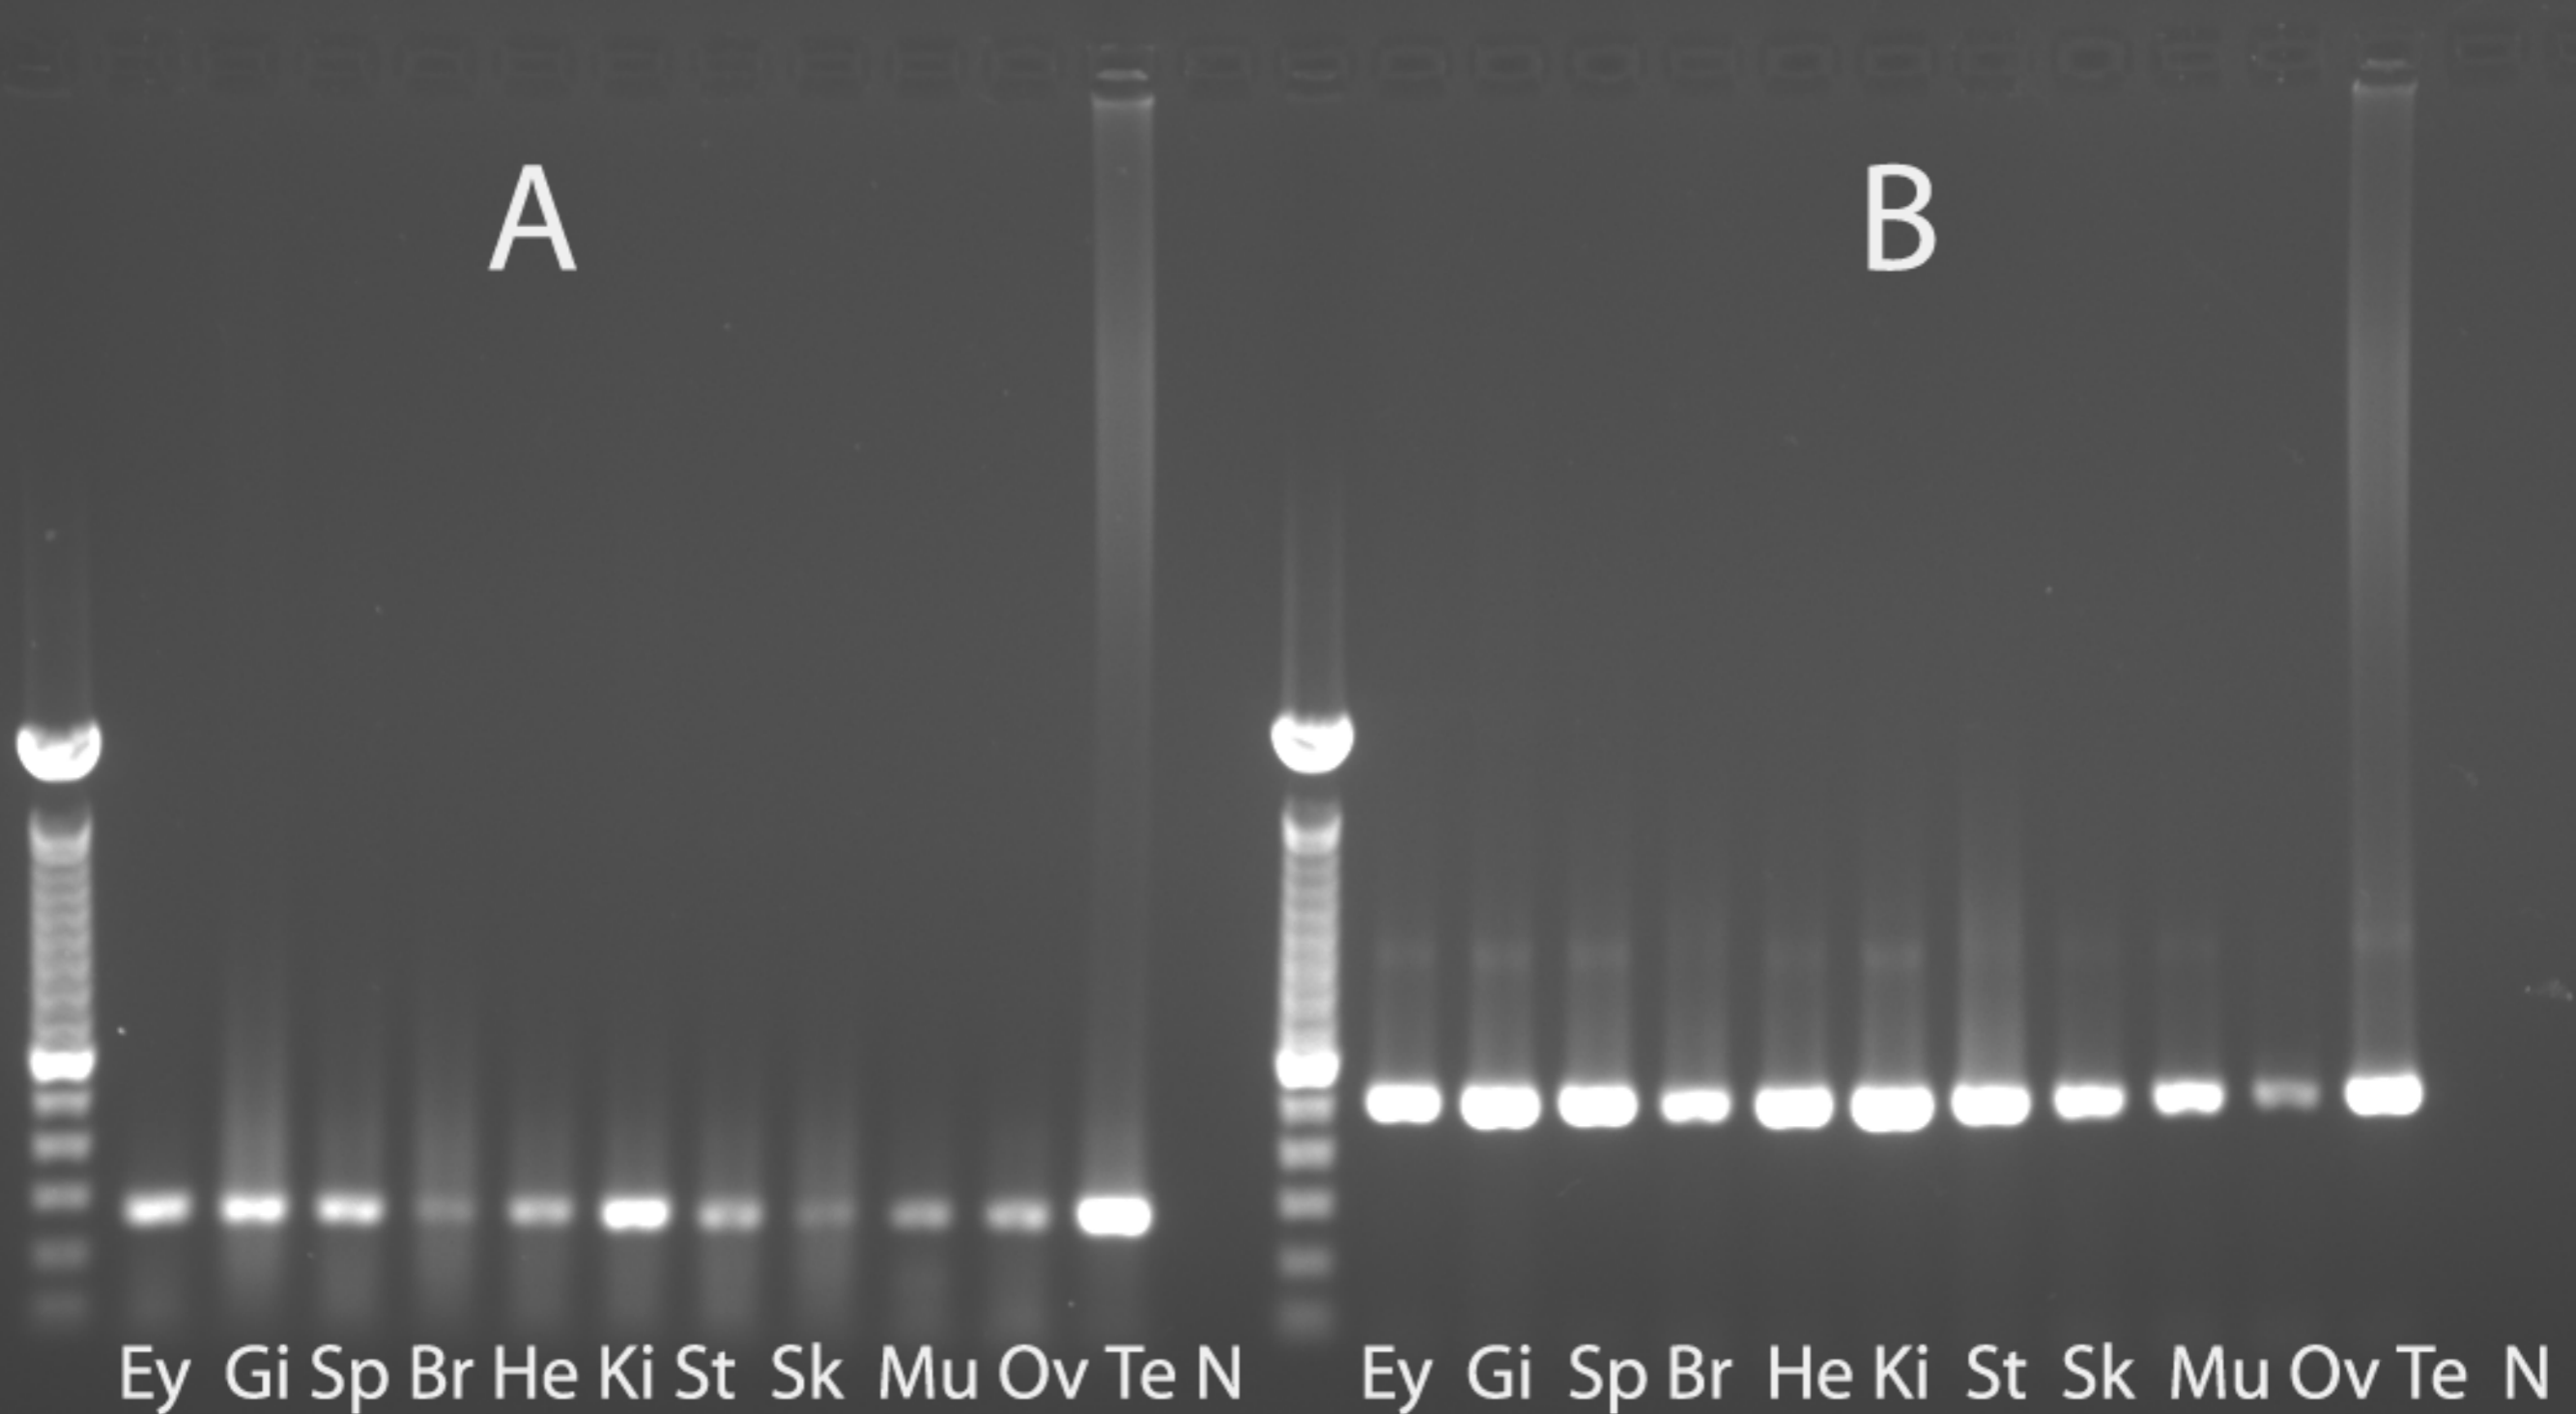

Supplement: qiucb3.pdf [file qiucb3.pdf]
